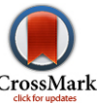

# Estrogen Receptor- $\alpha$ 36 Is Involved in Pterostilbene-Induced Apoptosis and Anti-Proliferation in *In Vitro* and *In Vivo* Breast Cancer

Chi Pan<sup>1</sup>, Yiwang Hu<sup>2</sup>, Jun Li<sup>3</sup>, Zhaoyi Wang<sup>4</sup>, Jianjin Huang<sup>5</sup>, Suzhan Zhang<sup>1\*</sup>, Ling Ding<sup>5\*</sup>

**1** Cancer Institute, Second Affiliated Hospital, Medicine School of Zhejiang University, Hangzhou, Zhejiang, China, **2** Department of Surgical Oncology, First Affiliated Hospital, Wenzhou Medical University, Wenzhou, Zhejiang, China, **3** Department of Surgical Oncology, Second Affiliated Hospital, Medicine School of Zhejiang University, Hangzhou, Zhejiang, China, **4** Department of Medical Microbiology & Immunology, Medical School of Creighton University, Omaha, Nebraska, United States of America, **5** Department of Medical Oncology, Second Affiliated Hospital, Medicine School of Zhejiang University, Hangzhou, Zhejiang, China

## Abstract

Pterostilbene (*trans*-3,5-dimethoxy-4'-hydroxystilbene) is an antioxidant primarily found in blueberries. It also inhibits breast cancer regardless of conventional estrogen receptor (ER- $\alpha$ 66) status by inducing both caspase-dependent and caspase-independent apoptosis. However, the pterostilbene-induced apoptosis rate in ER- $\alpha$ 66-negative breast cancer cells is much higher than that in ER- $\alpha$ 66-positive breast cancer cells. ER- $\alpha$ 36, a variant of ER- $\alpha$ 66, is widely expressed in ER- $\alpha$ 66-negative breast cancer, and its high expression mediates the resistance of ER- $\alpha$ 66-positive breast cancer patients to tamoxifen therapy. The aim of the present study is to determine the relationship between the antiproliferation activity of pterostilbene and ER- $\alpha$ 36 expression in breast cancer cells. Methyl-thiazolyl-tetrazolium (MTT) assay, apoptosis analysis, and an orthotopic xenograft mouse model were used to examine the effects of pterostilbene on breast cancer cells. The expressions of ER- $\alpha$ 36 and caspase 3, the activation of ERK and Akt were also studied through RT-PCR, western blot analysis, and immunohistochemical (IHC) staining. ER- $\alpha$ 36 knockdown was found to desensitize ER- $\alpha$ 66-negative breast cancer cells to pterostilbene treatment both *in vitro* and *in vivo*, and high ER- $\alpha$ 36 expression promotes pterostilbene-induced apoptosis in breast cancer cells. Western blot analysis data indicate that MAPK/ERK and PI3K/Akt signaling in breast cancer cells with high ER- $\alpha$ 36 expression are mediated by ER- $\alpha$ 36, and are inhibited by pterostilbene. These results suggest that ER- $\alpha$ 36 is a therapeutic target in ER- $\alpha$ 36-positive breast cancer, and pterostilbene is an inhibitor that targets ER- $\alpha$ 36 in the personalized therapy against ER- $\alpha$ 36-positive breast cancer.

**Citation:** Pan C, Hu Y, Li J, Wang Z, Huang J, et al. (2014) Estrogen Receptor- $\alpha$ 36 Is Involved in Pterostilbene-Induced Apoptosis and Anti-Proliferation in *In Vitro* and *In Vivo* Breast Cancer. PLoS ONE 9(8): e104459. doi:10.1371/journal.pone.0104459

**Editor:** Jin Q. Cheng, H.Lee Moffitt Cancer Center & Research Institute, United States of America

**Received:** May 14, 2014; **Accepted:** July 9, 2014; **Published:** August 15, 2014

This is an open-access article, free of all copyright, and may be freely reproduced, distributed, transmitted, modified, built upon, or otherwise used by anyone for any lawful purpose. The work is made available under the Creative Commons CC0 public domain dedication.

**Data Availability:** The authors confirm that all data underlying the findings are fully available without restriction. All relevant data are within the paper and its Supporting Information files.

**Funding:** This work was supported by grants from LD's Zhejiang qianjiang talents project (No. 2011R10029), and Zhejiang medicine scientific research fund projects (No. 2010ZB073) URL: www.zjnsf.gov.cn SZZ's National Natural Science Foundation of China (No. 81102012, No. 91229104). URL: www.nsf.gov.cn. The funders had no role in study design, data collection and analysis, decision to publish, or preparation of the manuscript.

**Competing Interests:** The authors have declared that no competing interests exist.

\* Email: zrsj@zju.edu.cn (SZ); lingding@zju.edu.cn (LD)

## Introduction

Breast cancer is the most common malignant tumor in women, and its incidence in the world is persistently rising [1]. It is a hormone-related systemic disease, and endocrine therapy effectively blocks its estrogen receptor (ER- $\alpha$ 66, the classic estrogen receptor) pathway to inhibit tumor progression. ER- $\alpha$ 66 expression is an important indicator of breast cancer, and previous studies show that patients with ER- $\alpha$ 66-negative tumors have shorter disease-free intervals and worse overall survival than patients with ER- $\alpha$ 66-positive tumors [2,3]. Tamoxifen (TAM, the selective estrogen receptor modulator) is the most effective drug commonly used for the endocrine therapy of ER- $\alpha$ 66-positive breast cancer patients [4]. Patients with ER-negative-tumors are therefore not supposed to respond to TAM therapy. However, clinical studies show that most ER-positive tumors eventually resist TAM therapy despite initial responsiveness to TAM [5,6]. Finding

new therapeutic strategies is an urgent topic in breast cancer research nowadays.

Pterostilbene (*trans*-3,5-dimethoxy-4'-hydroxystilbene; Pter) is an anti-oxidant predominantly found in blueberries, some types of grapes, and tree wood [7,8]. It is a natural dimethylated analog of the well-studied resveratrol (3,5,4'-trihydroxystilbene), which is a naturally occurring polyphenol that shows pleiotropic health benefits, including anti-oxidant, anti-inflammatory, anti-aging, cardioprotective, and neuroprotective activities [9]. However, pterostilbene is significantly more bioavailable than resveratrol after being ingested [10,11]. Pterostilbene has been shown to be an effective antioxidant in multiple cancer cell lines, which may facilitate its function as an anticarcinogenic agent. Pterostilbene inhibits breast cancer through mitochondrial depolarization and the induction of caspase-dependent [12,13,14] and caspase-independent apoptosis [15]. Phosphatidylinositol 3-kinase (PI3K)/serine/threonine kinase (Akt) activation, the vital pathway associated with accelerated cell proliferation, was found to be

decreased in cancer cells after pterostilbene treatment [16,17]. Chen *et al.* also reported that pterostilbene-treated lung cancer cells decreases extracellular regulated protein kinases 1/2 (ERK1/2) activation via the inhibition of EGFR-mediated pathways and apoptosis induction [17]. Preliminary studies also demonstrate that pterostilbene induces apoptosis and inhibits cell viability in both ER- $\alpha$ 66-positive and ER- $\alpha$ 66-negative breast cancer cell lines [18].

Wang *et al.* have recently identified and cloned a 36-kDa variant of ER- $\alpha$ 66, named ER- $\alpha$ 36, which is expressed in ER-negative tumor tissues and ER-negative breast cancer cell lines [19,20,21]. ER- $\alpha$ 36 and ER- $\alpha$ 66 are splicing variants from the same gene, but the previously unidentified promoter of ER- $\alpha$ 36 is located in the first intron of ER- $\alpha$ 66, indicating that ER- $\alpha$ 36 expression is subject to a transcriptional regulation different from ER- $\alpha$ 66 [22]. ER- $\alpha$ 36 is also predominantly localized in both the plasma membrane and cytoplasm, and it may be associated with both genomic and non-genomic signaling networks [19,23,24]. It therefore is a compound of interest, and possibly is a new therapeutic target in breast cancer.

Alosi *et al.* showed that the pterostilbene-induced apoptosis in ER- $\alpha$ 66-negative breast cancer cells MDA-MB-231 is more obvious than in ER- $\alpha$ 66-positive breast cancer cells MCF-7 [14]. ER- $\alpha$ 36-mediated mitogenic estrogen signaling in ER-negative breast cancer cells, such as MDA-MB-231, was previously found to lack ER- $\alpha$ 66 expression, but highly express ER- $\alpha$ 36 [25]. However, the exact mechanism of pterostilbene in ER- $\alpha$ 66-negative breast cancer cell apoptosis is still under investigation.

In this study, ER- $\alpha$ 36 is reported to play an important role in mediating the *in vivo* and *in vitro* pterostilbene-induced apoptosis of breast cancer cells. ER- $\alpha$ 36 was also found to mediate reducing the activation of the Akt and Erk1/2 pathway using pterostilbene.

## Materials and methods

### Ethical statement

All of the animal experiments described in this study were approved by the Institutional Animal Care and Use Committee (IACUC) at Zhejiang University. All animals were maintained in accordance with the IACUC guideline.

### Chemicals and antibodies

Monoclonal anti-ER- $\alpha$ 36 antibody was kindly provided by Professor Zhaoyi Wang (Department of Medical Microbiology & Immunology, Creighton University Medical School, Omaha, Nebraska, USA). Estrogen receptor  $\alpha$  antibody, cysteinyl aspartate specific proteinase 3 (caspase 3) antibody, Akt antibody, phospho-Akt antibody, extracellular regulated protein kinases 1/2 (ERK1/2) antibody, anti-phospho-ERK1/2 (Thr<sup>202</sup>/Tyr<sup>204</sup>) antibody, and anti- $\beta$ -actin antibody were purchased from Cell Signaling Technology (Danvers, MA). Pterostilbene was obtained from Merck KGaA (Darmstadt, Germany). Geneticin (G418), insulin, and AnnexinV-FITC Apoptosis Detection Kit were obtained from Sigma-Aldrich (St. Louis, MO).

### Cell culture and reagents

The cell lines MDA-MB-231 with ER- $\alpha$ 36 expression knocked down, MCF-7 transfected with high expression of ER- $\alpha$ 36, MDA-MB-231, and MCF-7 transfected with control vectors were named as Mb231/Si36, MCF-7/ER36, Mb231, and MCF-7, respectively, in this article. These cells were stably established through the method described before [25,26], and all were kindly provided by Professor Zhaoyi Wang, Creighton University. All parental and derivative cells were cultured at 37°C in a 5% CO<sub>2</sub> atmosphere in a humidified incubator. Mb231/Si36 and Mb231 were main-

tained in L-15 media (Gibco) supplemented with 10% fetal calf serum and 250  $\mu$ g/ml G418. MCF-7/ER36 and MCF-7 were maintained in DMEM (Gibco) supplemented with 10% fetal calf serum, 250  $\mu$ g/ml G418, and 10  $\mu$ g/ml insulin, following ATCC culture methods.

### RNA purification and RT-PCR

Total RNA was prepared using the “TRIzol” RNA purification reagent. The cDNA was synthesized through the reverse transcription of mRNA using oligo(dT) 20 primer and SuperScript III Reverse Transcriptase (Invitrogen). The RT-PCR analysis of ER- $\alpha$ 36 and  $\beta$ -actin was performed using gene specific primers, described before as the following [25]. ER- $\alpha$ 36: forward primer: 5'-CAAGTGGTTTCCTCGTGTCTAAAG-3'; reverse primer: 5'-TGTTGAGTGTGGTTGCCAGG-3';  $\beta$ -actin: forward primer: 5'-CCTGGCACCCAGCACAAAT-3'; reverse primer: 5'-GCTGATCCACATCTGCTGGAA-3'. The PCR was performed using the PCR Master Mix kit (Beyotime, Nantong, China), according to the manufacturer protocol. PCR products were analyzed by electrophoresis in a 2.5% agarose gel, and were visualized by ethidium bromide staining under UV illumination. The relative mRNA expression was determined from the optical density (OD) ratio of the corresponding mRNA bands, determined using BandScan 5.0 software (Glyko inc., Upper Heyford, UK).

### Methyl-thiazolyl-tetrazolium (MTT) assay

Mb231/Si36, Mb231, MCF-7/ER36, and MCF-7 cells were seeded at a density of  $3 \times 10^3$ /well in 96-well plates, and were incubated at 37°C overnight. The cells were then treated with various concentrations of pterostilbene for 72 h. Cell growth was measured by adding 20  $\mu$ l of 5 mg/ml 3-(4,5-dimethylthiazol-2-yl)-2,5-diphenyltetrazolium bromide (MTT) to each well, and the plates were incubated at 37°C for 4 h. The supernatant was removed afterwards, and the formazan crystals were dissolved in 200  $\mu$ l dimethylsulfoxide (DMSO) for 15 min. Absorbance was then measured at 570 nm wavelength using a multiwell spectrophotometer (Bio-Rad). Cell viability is expressed as the percentage of surviving pterostilbene-treated cells *vs.* control cells (whose viability was considered 100%). The experiments were independently performed in triplicate.

### Apoptosis analysis

Apoptosis was detected using an AnnexinV-FITC Apoptosis Detection Kit (Sigma-Aldrich, St. Louis, MO). Mb231/Si36, Mb231, MCF-7/ER36, and MCF-7 cells were treated with 30  $\mu$ M pterostilbene for 72 h before apoptosis analysis. Cells were harvested by trypsinization, washed twice with PBS, and incubated in 500  $\mu$ L of binding buffer and 10  $\mu$ L of Annexin V-FITC at room temperature for 30 min. Subsequently, 5  $\mu$ L of PI was added, and the cells were incubated for 5 min. Apoptosis data were collected using flow cytometry (BD FACSCanto II, BD Biosciences, San Jose, CA, USA), and were analyzed using the CellQuest software (Becton Dickinson, Franklin Lakes, NJ, USA). The experiments were independently performed three times.

### Western blot analysis

Whole cell extracts were obtained by treating cells with RIPA buffer (50 mM Tris pH 8.0, 150 mM NaCl, 1% Triton X-100, 0.5% Sodium deoxycholate, 0.1% SDS, 2 mM EDTA, and 5% Glycerol) containing a protease and phosphatase inhibitors cocktail (Sigma-Aldrich, St. Louis, MO, USA) for 30 min on ice. Appropriate protein extracts of cell lysates were fractionated through SDS-PAGE and were electro-transferred to polyvinyl-

dene difluoride (PVDF) membranes (Millipore, Billerica, MA, USA). The membranes were probed with various primary antibodies and HRP-conjugated secondary antibodies, and were visualized using enhanced chemiluminescence (ECL) detection reagents (Millipore, Billerica, MA, USA). The molecular weights of the immunoreactive proteins were estimated based on the PageRuler Prestained Protein ladder (MBI Fermentas, USA). Experiments were repeated at least three times.

### Orthotopic xenograft assay

Five to six weeks old female nude mice (01B74-Athymic NCr-nu/nu) were ordered from the Experimental Animal Center of Zhejiang Chinese Medical University, and were housed in cages with wood chip beddings in a temperature-controlled room (68°F to 72°F) with a 12-h light-dark cycle and 45% to 55% relative humidity, and were permitted free access to diet and drinking water. Mice were injected with  $1.6 \times 10^6$  Mb231/Si36 and Mb231 cells suspended in 100  $\mu$ l of L-15 medium containing 50% Matrigel (BD Bioscience) into one their left and right breast pads, respectively. The mice were randomly assigned to experimental and control groups ( $n = 3$ ) when the tumors reached the size of  $\sim 50$  mm<sup>3</sup>. The mice were fasted overnight, and were administered with 56 mg/kg pterostilbene or physiological saline (vehicle) by oral gavage once every four days for 3 weeks, as the methods described before [27]. Tumors were measured using calipers once every two days, and the tumor volumes were calculated (Volume (mm<sup>3</sup>) =  $\pi \times \text{length} \times \text{width}^2/6$ ). At the end of study, tumors were harvested, fixed, and embedded in paraffin. Tumor sections were subjected to standard H&E staining and immunohistochemical (IHC) staining using anti-ER- $\alpha$ 36 antibody. The experiment was conducted with replication.

### Immunohistochemical analysis

Immunohistochemical (IHC) analysis of ER- $\alpha$ 36 expression was performed using 5  $\mu$ m-thick paraffin-embedded tumor sections. The tissue sections were dewaxed and heated for 20 min with EDTA (pH 9.0) for antigen retrieval, endogenous peroxidase activity was quenched with 3% H<sub>2</sub>O<sub>2</sub> for 10 min at 37°C, and the slides were incubated with normal goat blood serum to block nonspecific binding sites. The slides were rinsed in phosphate-buffered saline, and were incubated for 2 h at 37°C with anti-ER- $\alpha$ 36 antibody at 1:100 dilution. The slides were then washed with PBS and were stained with horseradish peroxidase (HRP)-conjugated rabbit anti-mouse antibodies (Santa Cruz Biotechnology, Santa Cruz, CA) for 1 h. The slides were exposed to DAB after washing with PBS. The slides were counterstained using hematoxylin, and were coverslipped with neutrogum.

### Statistical analysis

Data are expressed as mean  $\pm$  standard error (SE). Two-tailed Student's t-tests were used for analyzing statistical differences between two groups using IBM SPSS software (SPSS, Chicago, IL, USA), and the significance was set at  $p < 0.05$ . Graphs were generated using GraphPad InStat software program (GraphPad Software, La Jolla, CA, USA).

## Results

### Breast cancer cells with high ER- $\alpha$ 36 expression were sensitive to *in vitro* pterostilbene treatment

RT-PCR was performed to determine ER- $\alpha$ 36 gene expression. The ER- $\alpha$ 66 and ER- $\alpha$ 36 protein expressions in these breast cancer cells were analyzed through Western blotting. The PCR amplicon obtained was the same size as that described before [25].

The ER- $\alpha$ 36 gene expression in Mb231/Si36 with ER- $\alpha$ 36 knocked down was dramatically decreased compared to parental Mb231 cells. MCF-7/ER36 overexpressed ER- $\alpha$ 36 compared to MCF-7 cells.  $\beta$ -actin gene expression was used as the internal control (Fig. 1A). The relative ER- $\alpha$ 36 mRNA expressions were determined using the ratio of the OD of mRNA bands compared and the OD of the corresponding  $\beta$ -actin bands (Fig. 1B). Data from RT-PCR are consistent with the protein levels determined through western blot analysis (Fig. 1C). The ER- $\alpha$ 66 protein expressions in Mb231 and Mb231/Si36 were undetectable, whereas it decreased in MCF-7/ER36 cells, compared with that in parental MCF-7 cells (Fig. 1C).

Whether the sensitivity of breast cancer cells to pterostilbene depend on ER- $\alpha$ 36 expression was determined. MTT assay was performed and Mb231/Si36 with negative ER- $\alpha$ 36 expression were found to exhibit dramatically decreased sensitivity to pterostilbene compared to the parental Mb231 cells. MCF-7/ER36 cells with ER- $\alpha$ 36 overexpression were also more sensitive to pterostilbene than MCF-7 cells (Fig. 1D).

These data indicate that higher ER- $\alpha$ 36 expression increases the sensitivity of breast cancer cells to pterostilbene.

### High ER- $\alpha$ 36 expression promotes pterostilbene-induced apoptosis in breast cancer cells

Pterostilbene induced apoptosis in conventional ER (ER- $\alpha$ 66)-positive breast cancer cells MCF-7 and ER-negative breast cancer cells Mb231 [12,14]. To investigate whether ER- $\alpha$ 36 affects pterostilbene-induced apoptosis, apoptosis in Mb231, Mb231/Si36, MCF-7, and MCF-7/ER36 cells were analyzed after treatment with 30  $\mu$ M pterostilbene for 72 h. Apoptosis was confirmed with Annexin V-FITC/PI dual staining using FACS-Canto II (BD Biosciences). Both early and late apoptotic cells were found to be significantly increased after pterostilbene treatment (Figs. 2A and B). Julie *et al.* demonstrated that pterostilbene increases caspase-dependent apoptosis, and its effect on Mb231 cells is more obvious than on MCF-7 cells [14]. The apoptotic percentage of Mb231 cells was consistently higher than that of MCF-7 cells ( $26.6 \pm 1.9\%$  versus  $10.5 \pm 1.5\%$ ) (Fig. 2A) in this study. Western blot analysis also revealed that pterostilbene inhibits ER- $\alpha$ 36 expression in ER- $\alpha$ 36-positive Mb231 cells and ER- $\alpha$ 36-overexpressing MCF-7/ER36 cells and increases caspase-3 expression in Mb231 cells, but not in MCF-7 cells (Fig. 2C). The apoptotic percentage of Mb231/Si36 with ER- $\alpha$ 36 knocked down induced by pterostilbene was decreased compared to parental Mb231 cells ( $26.6 \pm 1.9\%$  versus  $13.6 \pm 3.9\%$ ,  $p = 0.006$ ) (Figs. 2A and B). Pterostilbene did not effectively induce caspase-3 expression in Mb231/Si36 cells (Fig. 2C). The apoptosis induced by pterostilbene was similarly promoted in MCF-7/ER36 cells with higher ER- $\alpha$ 36 expression compared to the parental MCF-7 cells ( $25.7 \pm 2.2\%$  versus  $10.5 \pm 1.5\%$ ,  $p = 0.006$ ) (Figs. 2A and B). However, the caspase-3 expression was not significantly increased in both MCF-7 and MCF-7/ER36 cells after pterostilbene treatment (Fig. 2C). These data indicate that pterostilbene-induced apoptosis depends on high ER- $\alpha$ 36 expression in breast cancer cells.

### Pterostilbene deactivates ER- $\alpha$ 36-mediated MAPK/ERK and PI3K/Akt signaling in breast cancer cells

Previous studies demonstrate that pterostilbene decreases ERK1/2 and Akt activation in cancer cells [16,17]. The expression of ER- $\alpha$ 36 is also related to MAPK/ERK and PI3K/Akt signaling in breast cancer [19,25,28,29]. These findings suggest that ERK1/2 and Akt activation is initiated by non-

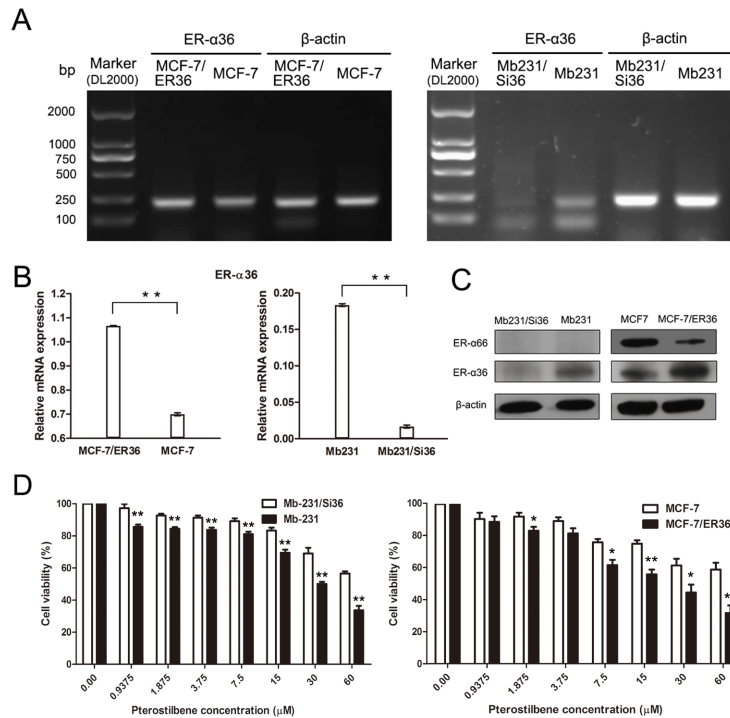

**Figure 1. High ER- $\alpha$ 36 expression sensitizes breast cancer cells to pterostilbene treatment.** **a.** ER- $\alpha$ 36 mRNA levels were measured in Mb231, Mb231/Si36, MCF-7, and MCF-7/ER36 cells using RT-PCR. **b.** The relative mRNA expressions are presented as the ratio of the OD of the corresponding mRNA bands compared to the OD of the  $\beta$ -actin bands. **c.** Western blots of ER- $\alpha$ 36 and ER- $\alpha$ 66 proteins in Mb231, Mb231/Si36, MCF-7, and MCF-7/ER36 cells using  $\beta$ -actin levels as the loading control. **d.** MTT assays measuring the cell proliferation of the two paired cells after control and pterostilbene treatments for 72 h. The relative cell numbers were normalized to those of their respective pterostilbene untreated controls (set as 100%). (Bars, SE. \* $p < 0.05$ , \*\* $p < 0.01$ ). doi:10.1371/journal.pone.0104459.g001

genomic signaling via ER- $\alpha$ 36. The MAPK/ERK and PI3K/Akt phosphorylation levels in pterostilbene-treated Mb231, Mb231/Si36, MCF-7 and MCF-7/ER36 cells were examined in this study

to investigate the role of ER- $\alpha$ 36 in the regulation of the reduced activation of ERK1/2 and Akt after pterostilbene treatment. The cells were treated with different concentrations pterostilbene

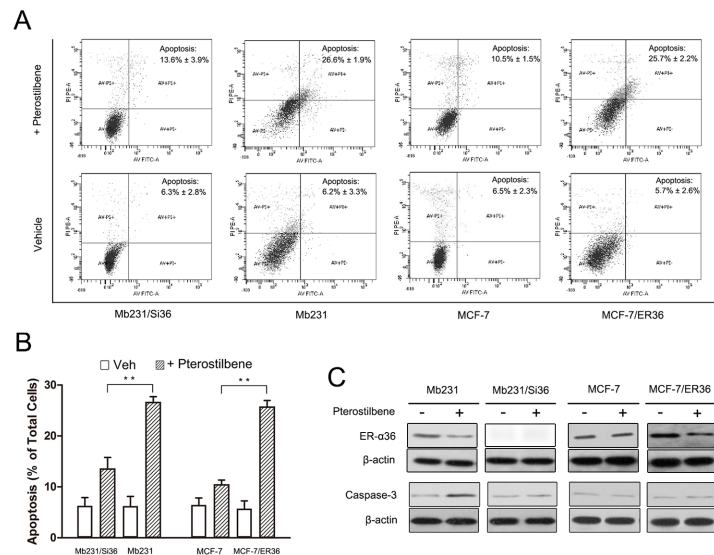

**Figure 2. High ER- $\alpha$ 36 expression enhances pterostilbene-induced apoptosis in breast cancer cells.** **a.** Apoptosis induction in Mb231, Mb231/Si36, MCF-7, and MCF-7/ER36 cells treated with 30  $\mu$ M pterostilbene for 72 h was analyzed through flow cytometry (X-Axis: Annexin V; Y-Axis: Propidium iodide, PI). The apoptosis rates are presented as both early and late apoptotic cells compared to total cells. **b.** Statistical analysis of FACS in (a). **c.** Caspase-3 expression in the two paired cells after control and 30  $\mu$ M pterostilbene treatment for 72 h. (Means  $\pm$  SE, \*\* $p < 0.01$ ). doi:10.1371/journal.pone.0104459.g002

(7.5  $\mu$ M, 15  $\mu$ M, and 30  $\mu$ M) for 72 h before Western blot analysis. ERK1/2 and Akt phosphorylation was then found to decrease in a dose-dependent manner in ER- $\alpha$ 36-positive Mb231 and MCF-7/ER36 with ER- $\alpha$ 36 overexpression, but not in MCF-7 cells (Fig. 3A). The cells were treated with 30  $\mu$ M pterostilbene for 24 h, 48 h, and 72 h to determine if the inhibition of ERK1/2 and Akt activation is in a time-dependent manner. Phosphor-ERK1/2 and phosphor-Akt expressions were found to be inhibited in a time-dependent manner in Mb231 and MCF-7/ER36 cells, but not in MCF-7 cells (Fig. 3B). The p-ERK1/2 and p-Akt expressions in Mb231/Si36 were nearly undetectable with or without pterostilbene treatment. These results indicate that ER- $\alpha$ 36 mediates pterostilbene to inhibit MAPK/ERK and PI3K/Akt phosphorylation in breast cancer cells, and ER- $\alpha$ 36 knockdown totally deactivates ERK1/2 and Akt phosphorylation in Mb231/Si36 cells.

### Silencing ER- $\alpha$ 36 reduces the sensitivity of the xenograft tumors of ER- $\alpha$ 36-positive breast cancer to pterostilbene *in vivo*

The *in vitro* finding that silencing ER- $\alpha$ 36 expression reduces the sensitivity of breast cancer cells to pterostilbene led to supposing that ER- $\alpha$ 36 is a therapy target for pterostilbene. A xenograft mouse model was further used to study the effect on xenograft tumor growth in nude mice *in vivo*. Mb231/Si36 and Mb231 cell suspensions were injected into the left and right breast pad, respectively, of each mouse. These mice were randomized into two groups, vehicle control (Veh) and pterostilbene treatment (+Pter), when the tumor size reached approximately 50 mm<sup>3</sup>. The ER- $\alpha$ 36-depleted Mb231/Si36 tumors in the left breast pad of the control group mice show significant reduction in growth compared with ER- $\alpha$ 36-positive Mb231 tumors in the right breast pad ( $p < 0.001$ , Fig. 4A (a)). The tumor weight significantly reduced in the left breast pad injected with ER- $\alpha$ 36-depleted Mb231/Si36 cells ( $p < 0.001$ , Fig. 4B). Pterostilbene treatment was observed to significantly reduce the growth rate of the Mb231 tumors compared with physiological saline treatment (vehicle control group) ( $p < 0.05$ , Fig. 4A(b)). The growth rate of Mb231/Si36

tumors did not significantly reduce after pterostilbene treatment compared to that of the vehicle control group (Fig. 4A(c)). The similar phenomena in tumor weight were also observed (Fig. 4B). Figure 4C shows the representative images of tumors in each group.

The tumors were dissected and processed for standard H&E staining and immunohistochemical staining of ER- $\alpha$ 36 protein expression to investigate whether the reduction of tumor growth is associated with the downregulation of ER- $\alpha$ 36 expression. A large area of necrosis was found in Mb231 xenograft tumors after pterostilbene treatment. However, the areas of necrosis in Mb231/Si36 tumors after pterostilbene treatment are small and scattered, which is similar to that of the vehicle (Fig. 4D). Pterostilbene was also found to inhibit ER- $\alpha$ 36 expression to some extent in Mb231 xenograft tumors (Fig. 4D). The ER- $\alpha$ 36 protein expression of Mb231/Si36 tumors with knockdown ER- $\alpha$ 36 is negative (Fig. 4D). These results are consistent with previous *in vitro* studies, showing that silencing ER- $\alpha$ 36 inhibits ER-negative breast cancer proliferation [24,28]. The observations indicate that ER- $\alpha$ 36 is a critical therapeutic target for breast cancer, and pterostilbene might be an ER- $\alpha$ 36 inhibitor for ER- $\alpha$ 36-positive breast cancer therapy.

### Discussion

Breast cancer is the most common malignant tumor, and is the major cause of cancer-related death in women in the world [30]. TAM treatment has substantially reduced the recurrence rates and mortality rates of breast cancer patients with ER-positive tumors [31]. However, the initial responsiveness to TAM therapy is limited because most advanced breast tumors recur with acquired resistance [5,6]. Approximately 30% of breast cancers are ER-negative, and do not respond to endocrine therapies. Identifying a novel target is therefore an urgent topic of research. Previous studies report that ER- $\alpha$ 36, a variant of conventional ER, is highly expressed in ER-negative tumors, and poorly expressed in ER-positive tumors [25,32]. The acquired TAM resistance could nevertheless be mediated by ER- $\alpha$ 36. If patients with ER- $\alpha$ 36-positive breast cancer tumors have high ER- $\alpha$ 36 expressions, they

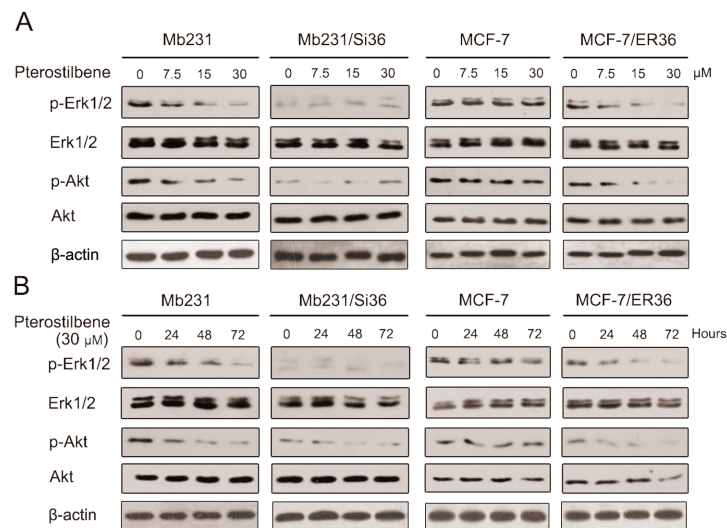

**Figure 3. Pterostilbene inhibits the ERK1/2 and Akt activation via ER- $\alpha$ 36 in breast cancer cells.** a. Mb231, Mb231/Si36, MCF-7, and MCF-7/ER36 cells were treated with the indicated concentrations of pterostilbene for 72 h. b. Mb231, Mb231/Si36, MCF-7, and MCF-7/ER36 cells were treated with 30  $\mu$ M pterostilbene for the indicated hours. Changes in p-ERK1/2 and p-Akt protein levels were analyzed through western blotting. The total ERK1/2 and Akt proteins were used as loading controls. doi:10.1371/journal.pone.0104459.g003

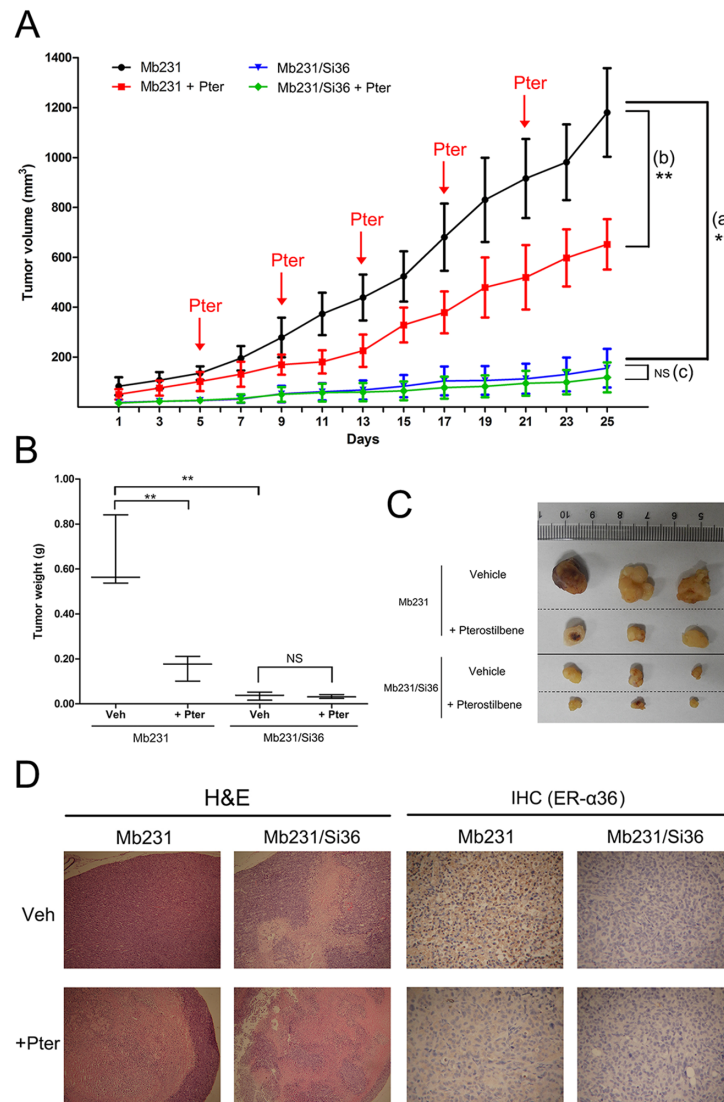

**Figure 4. ER- $\alpha$ 36 knockdown reduces the sensitivity of the xenograft tumors of ER- $\alpha$ 36-positive breast cancer to pterostilbene.** Mb231/Si36 and Mb231 cells were injected into the left and right breast pad, respectively of 5 to 6 weeks old nude mice. When the tumors reached about 50 mm<sup>3</sup> size, the mice were randomly assigned into two groups (n = 3): vehicle control (Veh) and pterostilbene treatment (+Pter). **a.** Tumor volumes were measured once every two days. Red arrows indicate the timed of pterostilbene administration. **b.** Tumor weights were calculated and are shown as a plot with the median and whiskers from minimum to maximum. **c.** The representative images of tumors in each group are shown. **d.** Paraffin-embedded tissue sections of the above tumors were subjected to H&E staining (X 40, left panels) and immunohistochemical (IHC) staining using the antibody against ER- $\alpha$ 36 (X 100, right panels). (\*\* $p$  < 0.01, NS: no significance). doi:10.1371/journal.pone.0104459.g004

would be more resistant to TAM therapy than those with ER- $\alpha$ 66-positive/ER- $\alpha$ 36-negative tumors [21,33]. The published literature suggests that ER- $\alpha$ 36 is a critical therapeutic target for personalized therapies for ER- $\alpha$ 66-negative/ER- $\alpha$ 36-positive breast cancer and ER- $\alpha$ 66-positive/ER- $\alpha$ 36-high positive tumors with acquired TAM resistance. Finding agents which inhibit ER- $\alpha$ 36 is therefore also our central issue. Pterostilbene is an antioxidant primarily found in blueberries, and is also considered to inhibit breast cancer, regardless of conventional estrogen receptor (ER- $\alpha$ 66) status, by inducing apoptosis.

Two pairs of breast cancer cells, Mb231 and Mb231/Si36 cells and MCF-7 and MCF-7/ER36 cells, were used in this study. The ER status of Mb231 cells is ER- $\alpha$ 66-negative/ER- $\alpha$ 36-positive (Fig. 1A-C), therefore its ER- $\alpha$ 36 was knocked down to investigate the role of ER- $\alpha$ 36 in pterostilbene-induced antiproliferation on

ER- $\alpha$ 66-negative/ER- $\alpha$ 36-positive breast cancer cells. ER- $\alpha$ 36 knockdown was found to desensitize Mb231/Si36 cells to pterostilbene treatment (Fig. 1D). Pterostilbene treatment was also found to drastically reduce the *in vivo* proliferation capacity of Mb231 tumors with ER- $\alpha$ 36-positive expression (Fig. 4A(b)). Clinical studies additionally demonstrated that approximately 40% of patients with ER- $\alpha$ 66-positive tumors have high ER- $\alpha$ 36 expression, and ER- $\alpha$ 36 overexpression is associated with poor disease-free survival and disease-specific survival in patients with ER- $\alpha$ 66-positive breast cancer [21]. Moreover, preclinical studies reveal that the pterostilbene-induced apoptosis in Mb231 is more obvious than in MCF-7 [14]. MCF-7/ER36 cells with ER- $\alpha$ 36 overexpression were therefore used to investigate whether breast cancer cells with ER- $\alpha$ 36 overexpression obtain more benefit from pterostilbene treatment. Overexpressing ER- $\alpha$ 36 in MCF-7/ER36

cells increased the sensitivity of cells to pterostilbene (Fig. 1D) and enhanced pterostilbene-induced apoptosis (Fig. 2A and B), as expected.

The MAPK/ERK pathway is a major intracellular communication in breast cancer [34], and PI3K/Akt pathway is also very important in cell proliferation and survival by inhibiting apoptosis [35]. Pterostilbene has been revealed to inhibit PI3K/Akt activation in breast cancer to suppress the heregulin- $\beta$ 1/HER-2-modulated invasive and aggressive phenotype of breast cancer cells [16,36,37], and reduced matrix metalloproteinase 9 (MMP) expression, which is an enzyme implicated in micrometastasis [16]. Previous studies have additionally reported that the ERK1/2 tumorigenic pathway in cancer cells could also be inhibited by pterostilbene treatment [17,36,38]. Pterostilbene was found to inhibit ER- $\alpha$ 36 expression in ER- $\alpha$ 36-positive Mb231 cells and ER- $\alpha$ 36-overexpressing MCF-7/ER36 cells (Fig. 2C), and ERK1/2 and Akt activation in Mb231 cells and MCF-7/ER36 cells in dose- and time-dependent manners, but not in parental MCF-7 cells. ERK1/2 and Akt phosphorylation were found to be abolished in Mb231/Si36 cells with ER- $\alpha$ 36 knockdown (Fig. 3). ER- $\alpha$ 36 may therefore be associated with MAPK/ERK and PI3K/Akt pathways, and ER- $\alpha$ 36 knockdown directly inhibits ERK1/2 and Akt activation, which is consistent with previous studies which report that both MAPK/ERK and PI3K/Akt signaling activation are regulated by ER- $\alpha$ 36 in breast cancer [19,23,25,29,39,40]. Ohshiro *et al.* also demonstrated that estradiol and anti-estrogenic agent treatment activated ERK1/2 only with the presence of ER- $\alpha$ 36, but not ER- $\alpha$ 66 [29]. ER- $\alpha$ 36 expression was also found to be decreased in tumor tissues after pterostilbene treatment (Fig. 4D). These studies suggested that the possible mechanism of the antiproliferative effect of pterostilbene in ER- $\alpha$ 66 negative breast cancer might inhibit MAPK/ERK and PI3K/Akt signal pathways via ER- $\alpha$ 36. Further investigations are needed to elucidate the exact mechanisms.

Pterostilbene treatment has been suggested to increase caspase 3 activity and expression, a critical mediator of mitochondrial apoptosis, and pterostilbene also could induce both caspase-dependent apoptosis and caspase-independent apoptosis in breast cancer cells [12,14,15]. In our study, caspase 3 expression was also found to be increased after pterostilbene treatment in ER- $\alpha$ 36-positive Mb231 cells, but not in ER- $\alpha$ 36-negative Mb231/Si36 cells (Fig. 2C). The pterostilbene-induced caspase-dependent apoptosis might be dependent on ER- $\alpha$ 36. However, Mena *et al.* recently demonstrated that caspase-independent apoptosis is also induced by pterostilbene, the mechanism of which involves lysosomal membrane permeabilization, and caspase 3 activity failed to increase after pterostilbene treatment in MCF-7 cells [15]. The caspase 3 expression was consistently shown in this study to be unchanged under pterostilbene treatment in MCF-7 cells with or without ER- $\alpha$ 36 overexpression (Fig. 2C). The pathways of pterostilben-induced-apoptosis in MCF-7 and MCF-7/ER36 cells

are therefore different from that in Mb231. Possibly, the underlying mechanism may involve lysosomal membrane permeabilization [15]. This speculation must be further investigated and verified.

Pterostilbene failed to inhibit ER- $\alpha$ 36 expression, ERK1/2 and Akt activation in ER- $\alpha$ 66-positive MCF-7 cells, though their ER- $\alpha$ 36 expression was positive. However, the inhibition could be restored by ER- $\alpha$ 36 overexpression (Fig. 3), probably because ER- $\alpha$ 36 overexpression competes with ER- $\alpha$ 66 for DNA-binding elements in estrogen-responsive genes, inhibiting the estrogen-dependent and estrogen-independent transactivation activities of ER- $\alpha$ 66 [19]. ER- $\alpha$ 66 has also been previously reported to suppress ER- $\alpha$ 36 promoter activity in an estrogen-independent manner, which could be released by ER- $\alpha$ 36 [22]. The ER- $\alpha$ 66 protein expression in MCF-7/ER36 cells decreased after transfection with ER- $\alpha$ 36 overexpression compared with parental MCF-7 cells (Fig. 1C), which is consistent with a previous study [33]. The proliferation of MCF-7/ER36 cells might thus be dependent on ER- $\alpha$ 36-activated MAPK/ERK and PI3K/Akt signaling, which could be blocked by pterostilbene treatment. This warrants future studies on the exact mechanisms of pterostilbene therapy against ER- $\alpha$ 66-positive/ER- $\alpha$ 36-positive breast cancer.

In summary, strong evidences for a key role of ER- $\alpha$ 36 in pterostilbene treatment against ER- $\alpha$ 66-negative/ER- $\alpha$ 36-positive breast cancer cells both *in vitro* and *in vivo* are provided in this study. A possible role for ER- $\alpha$ 36 in mediating pterostilbene sensitivity in ER- $\alpha$ 66-positive/ER- $\alpha$ 36-positive breast cancer cells is demonstrated *in vitro*. High ER- $\alpha$ 36 expression is demonstrated for the first time to promote pterostilbene-induced apoptosis in breast cancer cells and necrosis in xenograft tumors. Furthermore, ER- $\alpha$ 36 expression knockdown in Mb231/Si36 cells reduced the proliferation rate of tumors *in vivo*, together with decreased p-ERK1/2 and p-Akt expression. These finding suggested that ER- $\alpha$ 36 is a therapeutic target in ER- $\alpha$ 36-positive breast cancer tumors which have resistance to TAM. Pterostilbene is a selective inhibitor that targets ER- $\alpha$ 36 in the future therapy against ER- $\alpha$ 36-positive breast cancer.

## Acknowledgments

The authors express their gratitude to Prof. Zhaoyi Wang (Department of Medical Microbiology & Immunology, Creighton University Medical School, Omaha, Nebraska, USA) for providing the cell lines and anti-ER- $\alpha$ 36 antibody.

## Author Contributions

Conceived and designed the experiments: JL LD. Performed the experiments: CP YH. Analyzed the data: CP YH. Contributed reagents/materials/analysis tools: CP YH ZW JH SZ LD. Contributed to the writing of the manuscript: CP LD.

## References

- Smigal C, Jemal A, Ward E, Cokkinides V, Smith R, et al. (2006) Trends in breast cancer by race and ethnicity: update 2006. *CA Cancer J Clin* 56: 168–183.
- Fisher B, Redmond C, Fisher ER, Caplan R (1988) Relative worth of estrogen or progesterone receptor and pathologic characteristics of differentiation as indicators of prognosis in node negative breast cancer patients: findings from National Surgical Adjuvant Breast and Bowel Project Protocol B-06. *J Clin Oncol* 6: 1076–1087.
- Kinne DW, Butler JA, Kimmel M, Flehinger BJ, Menendez-Botet C, et al. (1987) Estrogen receptor protein of breast cancer in patients with positive nodes. High recurrence rates in the postmenopausal estrogen receptor-negative group. *Arch Surg* 122: 1303–1306.
- Carlson RW, Allred DC, Anderson BO, Burstein HJ, Carter WB, et al. (2009) Breast cancer. Clinical practice guidelines in oncology. *J Natl Compr Canc Netw* 7: 122–192.
- Ali S, Coombes RC (2002) Endocrine-responsive breast cancer and strategies for combating resistance. *Nat Rev Cancer* 2: 101–112.
- Clarke R, Liu MC, Bouker KB, Gu Z, Lee RY, et al. (2003) Antiestrogen resistance in breast cancer and the role of estrogen receptor signaling. *Oncogene* 22: 7316–7339.
- Roupe KA, Remsberg CM, Yanez JA, Davies NM (2006) Pharmacometrics of stilbenes: segueing towards the clinic. *Curr Clin Pharmacol* 1: 81–101.
- Rimando AM, Kalt W, Magee JB, Dewey J, Ballington JR (2004) Resveratrol, pterostilbene, and piceatannol in vaccinium berries. *J Agric Food Chem* 52: 4713–4719.

9. Brisdelli F, D'Andrea G, Bozzi A (2009) Resveratrol: a natural polyphenol with multiple chemopreventive properties. *Curr Drug Metab* 10: 530–546.
10. Langcake P, Pryce RJ (1977) A new class of phytoalexins from grapevines. *Experientia* 33: 151–152.
11. Lin HS, Yue BD, Ho PC (2009) Determination of pterostilbene in rat plasma by a simple HPLC-UV method and its application in pre-clinical pharmacokinetic study. *Biomed Chromatogr* 23: 1308–1315.
12. Chakraborty A, Gupta N, Ghosh K, Roy P (2010) In vitro evaluation of the cytotoxic, anti-proliferative and anti-oxidant properties of pterostilbene isolated from *Pterocarpus marsupium*. *Toxicol In Vitro* 24: 1215–1228.
13. Moon D, McCormack D, McDonald D, McFadden D (2013) Pterostilbene induces mitochondrially derived apoptosis in breast cancer cells in vitro. *J Surg Res* 180: 208–215.
14. Alosi JA, McDonald DE, Schneider JS, Privette AR, McFadden DW (2010) Pterostilbene inhibits breast cancer in vitro through mitochondrial depolarization and induction of caspase-dependent apoptosis. *J Surg Res* 161: 195–201.
15. Mena S, Rodríguez ML, Ponsoda X, Estrela JM, Jaattela M, et al. (2012) Pterostilbene-induced tumor cytotoxicity: a lysosomal membrane permeabilization-dependent mechanism. *PLoS One* 7: e44524.
16. Pan MH, Lin YT, Lin CL, Wei CS, Ho CT, et al. (2011) Suppression of Heregulin-beta1/HER2-Modulated Invasive and Aggressive Phenotype of Breast Carcinoma by Pterostilbene via Inhibition of Matrix Metalloproteinase-9, p38 Kinase Cascade and Akt Activation. *Evid Based Complement Alternat Med* 2011: 562187.
17. Chen RJ, Tsai SJ, Ho CT, Pan MH, Ho YS, et al. (2012) Chemopreventive effects of pterostilbene on urethane-induced lung carcinogenesis in mice via the inhibition of EGFR-mediated pathways and the induction of apoptosis and autophagy. *J Agric Food Chem* 60: 11533–11541.
18. McCormack D, McFadden D (2012) Pterostilbene and cancer: current review. *J Surg Res* 173: e53–61.
19. Wang Z, Zhang X, Shen P, Loggie BW, Chang Y, et al. (2006) A variant of estrogen receptor- $\{\alpha\}$ , hER- $\{\alpha\}$ 36: transduction of estrogen- and antiestrogen-dependent membrane-initiated mitogenic signaling. *Proc Natl Acad Sci U S A* 103: 9063–9068.
20. Lee LM, Cao J, Deng H, Chen P, Gatalica Z, et al. (2008) ER-alpha36, a novel variant of ER-alpha, is expressed in ER-positive and -negative human breast carcinomas. *Anticancer Res* 28: 479–483.
21. Shi L, Dong B, Li Z, Lu Y, Ouyang T, et al. (2009) Expression of ER- $\{\alpha\}$ 36, a novel variant of estrogen receptor  $\{\alpha\}$ , and resistance to tamoxifen treatment in breast cancer. *J Clin Oncol* 27: 3423–3429.
22. Zou Y, Ding L, Coleman M, Wang Z (2009) Estrogen receptor-alpha (ER-alpha) suppresses expression of its variant ER-alpha 36. *FEBS Lett* 583: 1368–1374.
23. Lin SL, Yan LY, Liang XW, Wang ZB, Wang ZY, et al. (2009) A novel variant of ER-alpha, ER-alpha36 mediates testosterone-stimulated ERK and Akt activation in endometrial cancer Hec1A cells. *Reprod Biol Endocrinol* 7: 102.
24. Zhang J, Li G, Li Z, Yu X, Zheng Y, et al. (2012) Estrogen-independent effects of ER-alpha36 in ER-negative breast cancer. *Steroids* 77: 666–673.
25. Zhang XT, Kang LG, Ding L, Vranic S, Gatalica Z, et al. (2011) A positive feedback loop of ER-alpha36/EGFR promotes malignant growth of ER-negative breast cancer cells. *Oncogene* 30: 770–780.
26. Kang L, Wang ZY (2010) Breast cancer cell growth inhibition by phenethyl isothiocyanate is associated with down-regulation of oestrogen receptor-alpha36. *J Cell Mol Med* 14: 1485–1493.
27. Narayanan NK, Nargi D, Randolph C, Narayanan BA (2009) Liposome encapsulation of curcumin and resveratrol in combination reduces prostate cancer incidence in PTEN knockout mice. *Int J Cancer* 125: 1–8.
28. Lin S-L, Yan L-Y, Zhang X-T, Yuan J, Li M, et al. (2010) ER- $\alpha$ 36, a variant of ER- $\alpha$ , promotes tamoxifen agonist action in endometrial cancer cells via the MAPK/ERK and PI3K/Akt pathways. *PLoS One* 5: e9013.
29. Ohshiro K, Schwartz AM, Levine PH, Kumar R (2012) Alternate estrogen receptors promote invasion of inflammatory breast cancer cells via non-genomic signaling. *PLoS One* 7: e30725.
30. DeSantis C, Ma J, Bryan L, Jemal A (2014) Breast cancer statistics, 2013. *CA Cancer J Clin* 64: 52–62.
31. (2005) Effects of chemotherapy and hormonal therapy for early breast cancer on recurrence and 15-year survival: an overview of the randomised trials. *Lancet* 365: 1687–1717.
32. Pelekanou V, Notas G, Kampa M, Tsentelierou E, Radojicic J, et al. (2012) ERalpha36, a new variant of the ERalpha is expressed in triple negative breast carcinomas and has a specific transcriptomic signature in breast cancer cell lines. *Steroids* 77: 928–934.
33. Li G, Zhang J, Jin K, He K, Zheng Y, et al. (2013) Estrogen receptor-alpha36 is involved in development of acquired tamoxifen resistance via regulating the growth status switch in breast cancer cells. *Mol Oncol* 7: 611–624.
34. Dufourny B, Alblas J, van Teeffelen HA, van Schaik FM, van der Burg B, et al. (1997) Mitogenic signaling of insulin-like growth factor I in MCF-7 human breast cancer cells requires phosphatidylinositol 3-kinase and is independent of mitogen-activated protein kinase. *J Biol Chem* 272: 31163–31171.
35. Jordan NJ, Gee JM, Barrow D, Wakeling AE, Nicholson RI (2004) Increased constitutive activity of PKB/Akt in tamoxifen resistant breast cancer MCF-7 cells. *Breast Cancer Res Treat* 87: 167–180.
36. Pan MH, Chiou YS, Chen WJ, Wang JM, Badmaev V, et al. (2009) Pterostilbene inhibited tumor invasion via suppressing multiple signal transduction pathways in human hepatocellular carcinoma cells. *Carcinogenesis* 30: 1234–1242.
37. Wang Y, Ding L, Wang X, Zhang J, Han W, et al. (2012) Pterostilbene simultaneously induces apoptosis, cell cycle arrest and cyto-protective autophagy in breast cancer cells. *Am J Transl Res* 4: 44–51.
38. Chen RJ, Ho CT, Wang YJ (2010) Pterostilbene induces autophagy and apoptosis in sensitive and chemoresistant human bladder cancer cells. *Mol Nutr Food Res* 54: 1819–1832.
39. Kang L, Zhang X, Xie Y, Tu Y, Wang D, et al. (2010) Involvement of estrogen receptor variant ER-alpha36, not GPR30, in nongenomic estrogen signaling. *Mol Endocrinol* 24: 709–721.
40. Tu BB, Lin SL, Yan LY, Wang ZY, Sun QY, et al. (2011) ER-alpha36, a novel variant of estrogen receptor alpha, is involved in EGFR-related carcinogenesis in endometrial cancer. *Am J Obstet Gynecol* 205: 227 e221–226.
